# Supplementary material for: FilMINT: An Outer Approximation-Based Solver for Convex Mixed-Integer Nonlinear Programs
Source: Atypon-hosted journal article supplement (doi:10.1287/ijoc.1090.0373), 2010-03-12
Supplement: ijoc.1090.0373-sm-abhishek_leyffer_linderoth-online-supplement.pdf [file ijoc.1090.0373-sm-abhishek_leyffer_linderoth-online-supplement.pdf]

# Online Appendix—FilMINT: An Outer-Approximation-Based Solver for Convex Mixed Integer Nonlinear Programs

Kumar Abhishek

Enterprise Optimization, United Airlines, 1200 E. Algonquin Rd., Elk Grove Village, IL 60007, USA,  
kumar.abhishek@united.com

Sven Leyffer

Mathematics and Computer Science Division, Argonne National Laboratory, Argonne, IL 60439 USA,  
leyffer@mcs.anl.gov

Jeff Linderoth

Department of Industrial and Systems Engineering, University of Wisconsin-Madison, 3226 Mechanical Engineering Building, 1513 University Avenue, Madison, WI 53706 USA, linderoth@wisc.edu

## A.1. Cutting Planes, Preprocessing, and Primal Heuristics

Figures A.1 and A.2 show the performance profiles encapsulating the results of the computational experiments described in Section 2.1. In the figures, the lines MILPcuts, preprocess, and primal-heuristic graph the relative performance of the algorithm with only that feature enabled. The performance of the vanilla version of the algorithm is also depicted.

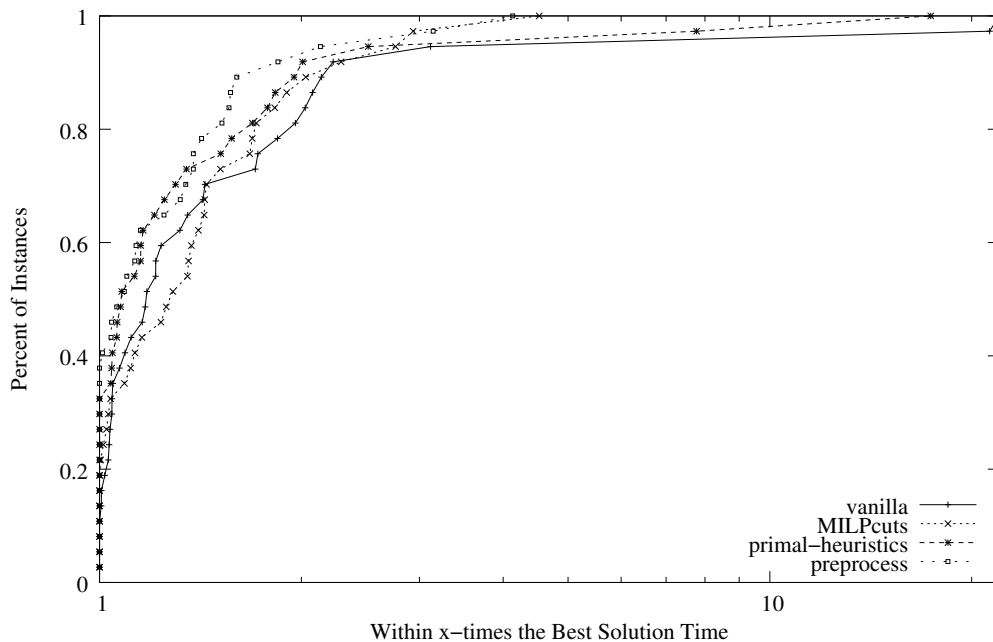

Figure A.1: Relative Performance of MILP techniques for moderate instances.

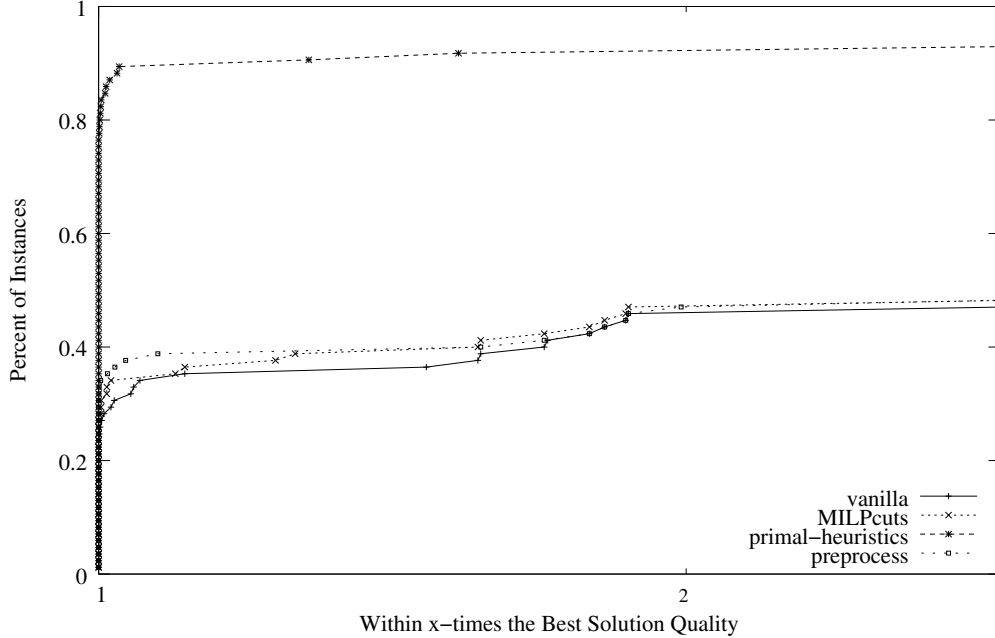

Figure A.2: Performance profile showing the effect of MILP cuts, preprocessing and heuristics for hard instances.

## A.2. Branching Rules

In Section 2.2, we described experiments aimed at determining the effect of advanced branching and node selection rules on solver performance. Performance profiles summarizing the results of the computational experiments for the different branching rules tested are shown in Figures A.3 and A.4. Profiles for the experiment on node selection rules are given in Figures A.5 and A.6.

Table A.1: Summary of Properties of Moderate Instances

| Instance           | Vars | Cont. Vars | Bin. Vars | Cons | NL. Cons | NL. Obj |
|--------------------|------|------------|-----------|------|----------|---------|
| m6                 | 86   | 56         | 30        | 157  | 12       |         |
| BatchS101006M      | 278  | 149        | 129       | 1019 | 1        | ✓       |
| BatchS121208M      | 406  | 203        | 203       | 1511 | 1        | ✓       |
| BatchStorage10BM10 | 238  | 149        | 89        | 799  | 1        | ✓       |
| BatchStorageBM10   | 238  | 149        | 89        | 799  | 1        | ✓       |
| BatchStorageBM9964 | 205  | 125        | 80        | 647  | 1        | ✓       |
| BatchStorageCH9964 | 527  | 447        | 80        | 1048 | 1        | ✓       |
| CLay0304H          | 176  | 140        | 36        | 258  | 48       |         |
| CLay0304M          | 56   | 20         | 36        | 106  | 48       |         |
| CLay0305M          | 85   | 30         | 55        | 155  | 60       |         |

Continued on next page

| Continued from previous page |      |            |           |      |          |         |
|------------------------------|------|------------|-----------|------|----------|---------|
| Instance                     | Vars | Cont. Vars | Bin. Vars | Cons | NL. Cons | NL. Obj |
| FLay04H                      | 234  | 210        | 24        | 282  | 4        |         |
| FLay05M                      | 62   | 22         | 40        | 65   | 5        |         |
| RSyn0805M02H                 | 700  | 552        | 148       | 1045 | 6        |         |
| RSyn0805M04H                 | 1400 | 1104       | 296       | 2438 | 12       |         |
| RSyn0810M02H                 | 790  | 622        | 168       | 1188 | 12       |         |
| RSyn0810M04H                 | 1580 | 1244       | 336       | 2784 | 24       |         |
| RSyn0810M                    | 185  | 111        | 74        | 312  | 6        |         |
| RSyn0815M02H                 | 898  | 710        | 188       | 1361 | 22       |         |
| RSyn0815M                    | 205  | 126        | 79        | 347  | 11       |         |
| RSyn0820M02H                 | 978  | 770        | 208       | 1500 | 28       |         |
| RSyn0830M02H                 | 1172 | 924        | 248       | 1794 | 40       |         |
| RSyn0840M02H                 | 1360 | 1072       | 288       | 2106 | 56       |         |
| SafetyLayout4Conv            | 182  | 150        | 32        | 228  | 32       |         |
| SafetyLayoutBM52             | 110  | 60         | 50        | 125  | 40       |         |
| SafetynorotationBM           | 168  | 108        | 60        | 162  | 6        | ✓       |
| SLay06H                      | 342  | 282        | 60        | 435  | 0        | ✓       |
| SLay06M                      | 102  | 42         | 60        | 135  | 0        | ✓       |
| Syn10M03M                    | 165  | 105        | 60        | 342  | 18       |         |
| Syn10M04M                    | 220  | 140        | 80        | 516  | 24       |         |
| Syn15M02M                    | 170  | 110        | 60        | 313  | 22       |         |
| Syn15M03M                    | 255  | 165        | 90        | 537  | 33       |         |
| Syn20M04H                    | 764  | 604        | 160       | 1452 | 56       |         |
| Syn30M03H                    | 864  | 684        | 180       | 1485 | 60       |         |
| Syn30M04H                    | 1152 | 912        | 240       | 2160 | 80       |         |
| Syn30M                       | 100  | 70         | 30        | 167  | 20       |         |
| Syn40M02H                    | 764  | 604        | 160       | 1212 | 56       |         |
| Syn40M03H                    | 1146 | 906        | 240       | 1998 | 84       |         |

Table A.2: Summary of Properties of Difficult Instances

| Instance | Vars | Cont. Vars | Bin. Vars | Cons | NL. Cons | NL. Obj |
|----------|------|------------|-----------|------|----------|---------|
| csched2  | 400  | 92         | 308       | 137  | 0        | ✓       |
| fo7      | 114  | 72         | 42        | 211  | 14       |         |
| fo72     | 114  | 72         | 42        | 211  | 14       |         |
| fo8      | 146  | 90         | 56        | 273  | 16       |         |
| fo9      | 182  | 110        | 72        | 343  | 18       |         |
| m7       | 114  | 72         | 42        | 211  | 14       |         |
| o7       | 114  | 72         | 42        | 211  | 14       |         |
| o72      | 114  | 72         | 42        | 211  | 14       |         |

Continued on next page

| Continued from previous page |      |            |           |      |          |         |
|------------------------------|------|------------|-----------|------|----------|---------|
| Instance                     | Vars | Cont. Vars | Bin. Vars | Cons | NL. Cons | NL. Obj |
| tls12                        | 812  | 144        | 656       | 384  | 12       |         |
| tls4                         | 105  | 16         | 85        | 64   | 4        |         |
| tls5                         | 161  | 25         | 131       | 90   | 5        |         |
| tls6                         | 215  | 36         | 173       | 120  | 6        |         |
| tls7                         | 345  | 49         | 289       | 154  | 7        |         |
| stockcycle                   | 480  | 48         | 432       | 97   | 0        | ✓       |
| trimloss12                   | 812  | 156        | 656       | 384  | 12       |         |
| trimloss4                    | 105  | 20         | 85        | 64   | 4        |         |
| trimloss5                    | 161  | 30         | 131       | 90   | 5        |         |
| trimloss6                    | 215  | 42         | 173       | 120  | 6        |         |
| trimloss7                    | 345  | 56         | 289       | 154  | 7        |         |
| BatchS151208M                | 445  | 242        | 203       | 1781 | 1        | ✓       |
| BatchS201210M                | 558  | 307        | 251       | 2327 | 1        | ✓       |
| CLay0205H                    | 260  | 210        | 50        | 365  | 40       |         |
| CLay0205M                    | 80   | 30         | 50        | 135  | 40       |         |
| CLay0305H                    | 275  | 220        | 55        | 395  | 60       |         |
| FLay05H                      | 382  | 342        | 40        | 465  | 5        |         |
| FLay06H                      | 566  | 506        | 60        | 693  | 6        |         |
| FLay06M                      | 86   | 26         | 60        | 93   | 6        |         |
| RSyn0805H                    | 720  | 424        | 296       | 1886 | 12       |         |
| RSyn0805M02M                 | 360  | 212        | 148       | 769  | 6        |         |
| RSyn0805M03H                 | 1050 | 828        | 222       | 1698 | 9        |         |
| RSyn0805M03M                 | 540  | 318        | 222       | 1284 | 9        |         |
| RSyn0805M04M                 | 720  | 424        | 296       | 1886 | 12       |         |
| RSyn0810H                    | 820  | 484        | 336       | 2140 | 24       |         |
| RSyn0810M02M                 | 410  | 242        | 168       | 866  | 12       |         |
| RSyn0810M03H                 | 1185 | 933        | 252       | 1935 | 18       |         |
| RSyn0810M03M                 | 615  | 363        | 252       | 1452 | 18       |         |
| RSyn0810M04M                 | 820  | 484        | 336       | 2140 | 24       |         |
| RSyn0815H                    | 940  | 564        | 376       | 2430 | 44       |         |
| RSyn0815M02M                 | 470  | 282        | 188       | 981  | 22       |         |
| RSyn0815M03H                 | 1347 | 1065       | 282       | 2217 | 33       |         |
| RSyn0815M03M                 | 705  | 423        | 282       | 1647 | 33       |         |
| RSyn0815M04H                 | 1796 | 1420       | 376       | 3190 | 44       |         |
| RSyn0815M04M                 | 940  | 564        | 376       | 2430 | 44       |         |
| RSyn0820H                    | 1020 | 604        | 416       | 2676 | 56       |         |
| RSyn0820M02M                 | 510  | 302        | 208       | 1074 | 28       |         |
| RSyn0820M03H                 | 1467 | 1155       | 312       | 2448 | 42       |         |
| RSyn0820M03M                 | 765  | 453        | 312       | 1809 | 42       |         |
| RSyn0820M04H                 | 1956 | 1540       | 416       | 3528 | 56       |         |
| RSyn0820M04M                 | 1020 | 604        | 416       | 2676 | 56       |         |

Continued on next page

| Continued from previous page |      |            |           |      |          |         |
|------------------------------|------|------------|-----------|------|----------|---------|
| Instance                     | Vars | Cont. Vars | Bin. Vars | Cons | NL. Cons | NL. Obj |
| RSyn0820M                    | 215  | 131        | 84        | 371  | 14       |         |
| RSyn0830H                    | 1240 | 744        | 496       | 3192 | 80       |         |
| RSyn0830M02M                 | 620  | 372        | 248       | 1272 | 40       |         |
| RSyn0830M03H                 | 1758 | 1386       | 372       | 2934 | 60       |         |
| RSyn0830M03M                 | 930  | 558        | 372       | 2151 | 60       |         |
| RSyn0830M04H                 | 2344 | 1848       | 496       | 4236 | 80       |         |
| RSyn0830M04M                 | 1240 | 744        | 496       | 3192 | 80       |         |
| RSyn0830M                    | 250  | 156        | 94        | 425  | 20       |         |
| RSyn0840H                    | 1440 | 864        | 576       | 3728 | 112      |         |
| RSyn0840M02M                 | 720  | 432        | 288       | 1480 | 56       |         |
| RSyn0840M03H                 | 2040 | 1608       | 432       | 3447 | 84       |         |
| RSyn0840M03M                 | 1080 | 648        | 432       | 2508 | 84       |         |
| RSyn0840M04H                 | 2720 | 2144       | 576       | 4980 | 112      |         |
| RSyn0840M04M                 | 1440 | 864        | 576       | 3728 | 112      |         |
| RSyn0840M                    | 280  | 176        | 104       | 484  | 28       |         |
| Safety3                      | 259  | 161        | 98        | 294  | 0        | ✓       |
| safetyrotationCH             | 408  | 348        | 60        | 462  | 6        | ✓       |
| SLay07H                      | 476  | 392        | 84        | 609  | 0        | ✓       |
| SLay07M                      | 140  | 56         | 84        | 189  | 0        | ✓       |
| SLay08H                      | 632  | 520        | 112       | 812  | 0        | ✓       |
| SLay08M                      | 184  | 72         | 112       | 252  | 0        | ✓       |
| SLay09H                      | 810  | 666        | 144       | 1044 | 0        | ✓       |
| SLay09M                      | 234  | 90         | 144       | 324  | 0        | ✓       |
| SLay10H                      | 1010 | 830        | 180       | 1305 | 0        | ✓       |
| SLay10M                      | 290  | 110        | 180       | 405  | 0        | ✓       |
| Syn15M04M                    | 340  | 220        | 120       | 806  | 44       |         |
| Syn20M02M                    | 210  | 130        | 80        | 406  | 28       |         |
| Syn20M03M                    | 315  | 195        | 120       | 699  | 42       |         |
| Syn20M04M                    | 420  | 260        | 160       | 1052 | 56       |         |
| Syn30M02M                    | 320  | 200        | 120       | 604  | 40       |         |
| Syn30M03M                    | 480  | 300        | 180       | 1041 | 60       |         |
| Syn30M04M                    | 640  | 400        | 240       | 1568 | 80       |         |
| Syn40M02M                    | 420  | 260        | 160       | 812  | 56       |         |
| Syn40M03M                    | 630  | 390        | 240       | 1398 | 84       |         |
| Syn40M04M                    | 840  | 520        | 320       | 2104 | 112      |         |
| Syn40M                       | 130  | 90         | 40        | 226  | 28       |         |

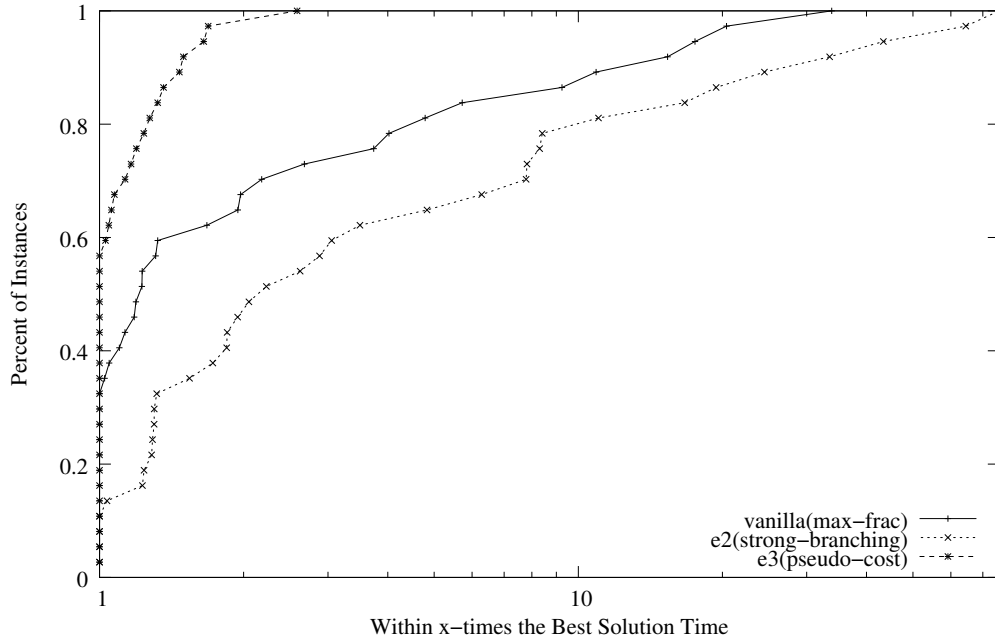

Figure A.3: Relative Performance of Branching Rules for Moderate Instances.

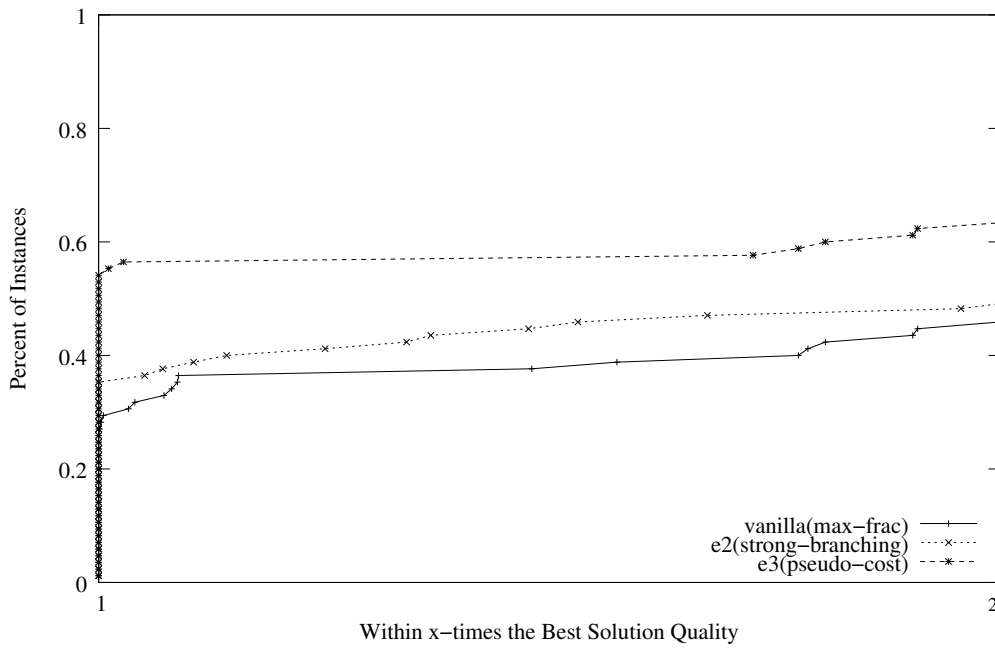

Figure A.4: Relative Performance of Branching Rules for Difficult Instances.

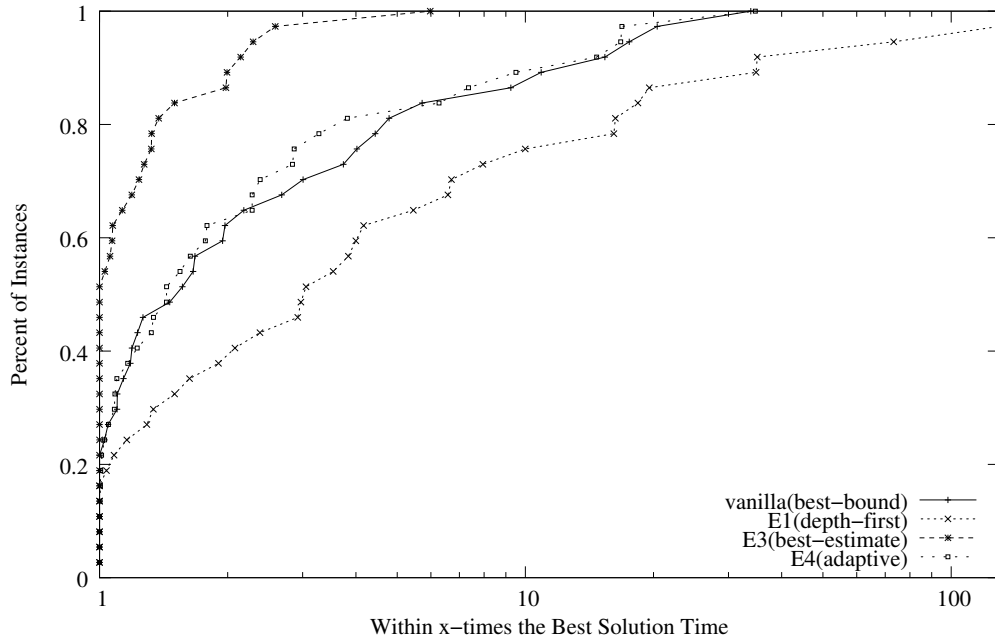

Figure A.5: Relative Performance of Node Selection Rules for Moderate Instances.

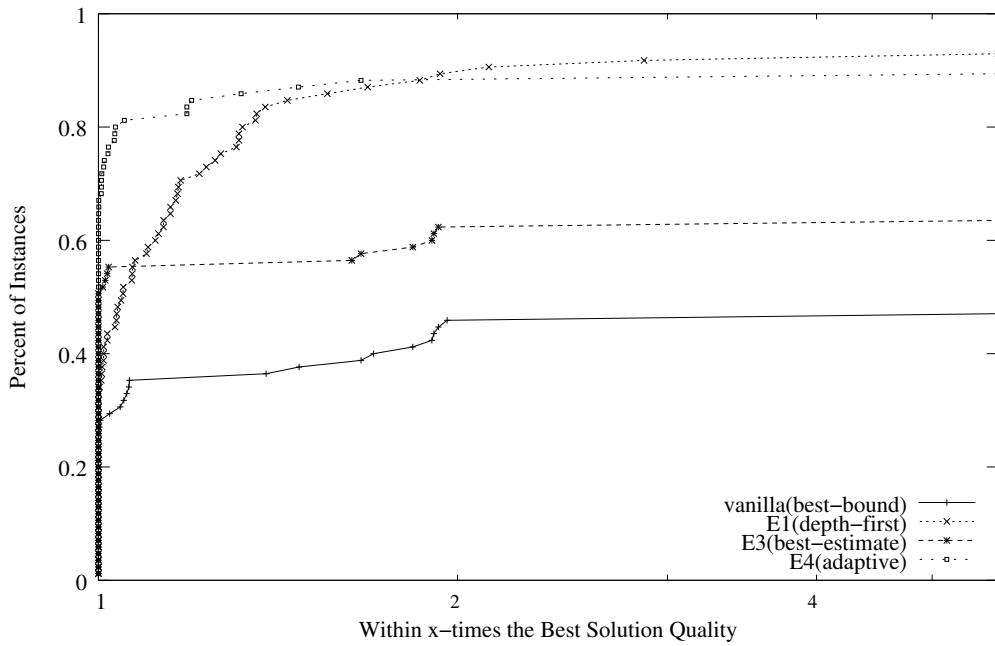

Figure A.6: Relative Performance of Node Selection Rules for Difficult Instances.

Table A.3: CPU Time Required for Moderate Instances

| Instance           | MINLP-BB | vanilla | FilMINT |
|--------------------|----------|---------|---------|
| m6                 | 394.3    | 640.5   | 36.6    |
| BatchS101006M      | 163.6    | 3209.6  | 15.2    |
| BatchS121208M      | 1436.5   | 5785.4  | 36.7    |
| BatchStorage10BM10 | 1316.5   | 7125.4  | 540     |
| BatchStorageBM10   | 1730.4   | 6894.1  | 887.2   |
| BatchStorageBM9964 | 60.7     | 333.4   | 46      |
| BatchStorageCH9964 | 474      | 458.8   | 78.7    |
| CLay0304H          | 394.3    | 692.9   | 30.2    |
| CLay0304M          | 256.7    | 540.2   | 20.6    |
| CLay0305M          | 298.1    | 927.9   | 43.8    |
| FLay04H            | 77.1     | 45.8    | 13.7    |
| FLay05M            | 324.4    | 10084.3 | 823.7   |
| RSyn0805M02H       | 1398.5   | 16.3    | 3.1     |
| RSyn0805M04H       | 798.0    | 12.7    | 7.7     |
| RSyn0810M02H       | 843.6    | 12.2    | 3.9     |
| RSyn0810M04H       | 1248.0   | 33.9    | 15.1    |
| RSyn0810M          | 448.5    | 402.7   | 13.9    |
| RSyn0815M02H       | 541.1    | 10.5    | 3.1     |
| RSyn0815M          | 402.7    | 143.9   | 16      |
| RSyn0820M02H       | 2446.4   | 38      | 4.6     |
| RSyn0830M02H       | 2000.0   | 20.2    | 5.6     |
| RSyn0840M02H       | 1122.2   | 18.5    | 10.7    |
| SafetyLayout4Conv  | 276.2    | 46.3    | 5.8     |
| SafetyLayoutBM52   | 921      | 8       | 1.7     |
| SafetynorotationBM | 83.7     | 183.5   | 36.4    |
| SLay06H            | 1962.8   | 2077.4  | 10.2    |
| SLay06M            | 84.3     | 39.4    | 1.0     |
| Syn10M03M          | 261.8    | 21.3    | 3.2     |
| Syn10M04M          | 2089.7   | 59.5    | 7.1     |
| Syn15M02M          | 394.1    | 20.4    | 1.2     |
| Syn15M03M          | 2148.3   | 73.7    | 4.2     |
| Syn20M04H          | 62.0     | 6.1     | 3.3     |
| Syn30M03H          | 130.2    | 10.4    | 3.7     |
| Syn30M04H          | 360.9    | 23.8    | 9.0     |
| Syn30M             | 226.4    | 563.6   | 6.3     |
| Syn40M02H          | 125.8    | 4.5     | 2.1     |
| Syn40M03H          | 615.5    | 32.9    | 9.5     |

In Table A.4, a \* next to the solution value implies that the solver proved the optimality of the solution within the time limit.

Table A.4: Value of Best Solution Found and CPU Time for Difficult Instances

| Instance      | MINLP-BB   |       | Vanilla   |      | FilMINT    |       |
|---------------|------------|-------|-----------|------|------------|-------|
|               | Value      | Time  | Value     | Time | Value      | Time  |
| csched2       | -166102.0* | 370   | -158733.8 |      | -164027.6  |       |
| fo7           | 45.6       |       | $\infty$  |      | 20.7*      | 2237  |
| fo72          | 40.6       |       | $\infty$  |      | 17.7*      | 21    |
| fo8           | 36.1       |       | $\infty$  |      | 22.4*      | 2866  |
| fo9           | $\infty$   |       | $\infty$  |      | 23.5*      | 8175  |
| m7            | 220.5      |       | $\infty$  |      | 106.8*     | 173   |
| o7            | 164        |       | $\infty$  |      | 131.7*     | 4145  |
| o72           | 132.7      |       | $\infty$  |      | 116.9*     | 5542  |
| tls12         | $\infty$   |       | $\infty$  |      | $\infty$   |       |
| tls4          | $\infty$   |       | $\infty$  |      | 10.3       |       |
| tls5          | $\infty$   |       | $\infty$  |      | 12         |       |
| tls6          | $\infty$   |       | $\infty$  |      | $\infty$   |       |
| tls7          | $\infty$   |       | $\infty$  |      | $\infty$   |       |
| stockcycle    | 119948.7*  | 322   | 206468.2  |      | 159828.7   |       |
| trimloss12    | $\infty$   |       | $\infty$  |      | $\infty$   |       |
| trimloss4     | 11.3       |       | $\infty$  |      | 8.3*       | 903   |
| trimloss5     | 12.6       |       | $\infty$  |      | 11.2       |       |
| trimloss6     | $\infty$   |       | $\infty$  |      | 18.9       |       |
| trimloss7     | $\infty$   |       | $\infty$  |      | $\infty$   |       |
| BatchS151208M | 1543472.4  |       | 1543472.4 |      | 1543472.4  |       |
| BatchS201210M | 2295348.8* | 9041  | $\infty$  |      | 2295348.8* | 223   |
| CLay0205H     | 8092.5*    | 3994  | 8092.5*   | 1448 | 8092.5*    | 70    |
| CLay0205M     | 25611.3    |       | 8092.5*   | 397  | 8092.5*    | 19    |
| CLay0305H     | 8092.5*    | 3948  | 8497.5    |      | 8092.5*    | 129   |
| FLay05H       | 64.5*      | 14380 | 64.5      |      | 64.5*      | 2031  |
| FLay06H       | 66.9       |       | 66.9      |      | 66.9       |       |
| FLay06M       | 66.9*      | 167   | 66.9      |      | 66.9*      | 11703 |
| RSyn0805H     | -6573.3    |       | $\infty$  |      | -7174.2*   | 706   |
| RSyn0805M02M  | -2168      |       | $\infty$  |      | -2238.4*   | 127   |
| RSyn0805M03H  | -3022.1    |       | -3068.9*  | 23   | -3068.9*   | 6     |
| RSyn0805M03M  | -2607.9    |       | $\infty$  |      | -3068.9*   | 486   |
| RSyn0805M04M  | -6573.3    |       | $\infty$  |      | -7174.2*   | 707   |
| RSyn0810H     | $\infty$   |       | $\infty$  |      | -6581.9*   | 8295  |
| RSyn0810M02M  | -1129.3    |       | $\infty$  |      | -1741.4*   | 2094  |
| RSyn0810M03H  | -2722.4*   | 4107  | -2722.4*  | 52   | -2722.4*   | 9     |

Continued on next page

| Continued from previous page |          |       |          |      |           |      |
|------------------------------|----------|-------|----------|------|-----------|------|
|                              | MINLP-BB |       | Vanilla  |      | FilMINT   |      |
| Instance                     | Value    | Time  | Value    | Time | Value     | Time |
| RSyn0810M03M                 | -2196.2  |       | $\infty$ |      | -2722.5*  | 7142 |
| RSyn0810M04M                 | $\infty$ |       | $\infty$ |      | -6581.9*  | 8201 |
| RSyn0815H                    | $\infty$ |       | $\infty$ |      | -3353.4   |      |
| RSyn0815M02M                 | -493.7   |       | $\infty$ |      | -1774.4*  | 4632 |
| RSyn0815M03H                 | -2807.9  |       | -2827.9* | 112  | -2827.9*  | 11   |
| RSyn0815M03M                 | -2284.7  |       | $\infty$ |      | -2827.6   |      |
| RSyn0815M04H                 | -3375.9  |       | -3398.7  |      | -3405.8   |      |
| RSyn0815M04M                 | $\infty$ |       | $\infty$ |      | -3353.4   |      |
| RSyn0820H                    | $\infty$ |       | $\infty$ |      | -2411.5   |      |
| RSyn0820M02M                 | -154.7   |       | $\infty$ |      | -1026.9   |      |
| RSyn0820M03H                 | -2028.8* | 11288 | -2028.8* | 824  | -2022.6   |      |
| RSyn0820M03M                 | -1014.6  |       | $\infty$ |      | -1988.9   |      |
| RSyn0820M04H                 | $\infty$ |       | -2450.8  |      | 99.4      |      |
| RSyn0820M04M                 | $\infty$ |       | $\infty$ |      | -2433.8   |      |
| RSyn0820M                    | -1022    |       | -1150.3  |      | -1146.3   |      |
| RSyn0830H                    | $\infty$ |       | $\infty$ |      | -2385.9   |      |
| RSyn0830M02M                 | -121.3   |       | $\infty$ |      | -716.5    |      |
| RSyn0830M03H                 | -1543.1  |       | -1543.1  |      | 229.3     |      |
| RSyn0830M03M                 | -1249.3  |       | $\infty$ |      | -1469.3   |      |
| RSyn0830M04H                 | $\infty$ |       | -2527.3  |      | 102.9     |      |
| RSyn0830M04M                 | $\infty$ |       | $\infty$ |      | -2385.9   |      |
| RSyn0830M                    | -402.4   |       | $\infty$ |      | -506.7    |      |
| RSyn0840H                    | $\infty$ |       | $\infty$ |      | -2448.7   |      |
| RSyn0840M02M                 | -58.7    |       | $\infty$ |      | -696      |      |
| RSyn0840M03H                 | -2742.6  |       | -2742.6  |      | -1031.9   |      |
| RSyn0840M03M                 | $\infty$ |       | $\infty$ |      | -2674.1   |      |
| RSyn0840M04H                 | $\infty$ |       | -2564.5  |      | 143.3     |      |
| RSyn0840M04M                 | $\infty$ |       | $\infty$ |      | -2448.7   |      |
| RSyn0840M                    | -52.9    |       | $\infty$ |      | -289.1    |      |
| Safety3                      | 195782.3 |       | 38435    |      | 27803.0*  | 5515 |
| safetyrotationCH             | 28380.7* | 6600  | 28380.7* | 5018 | 28380.7*  | 736  |
| SLay07H                      | 64748.8* | 5545  | 64748.8  |      | 64748.8*  | 60   |
| SLay07M                      | 77483.4  |       | 64748.8* | 338  | 64748.8*  | 2    |
| SLay08H                      | 86744.6  |       | 90110.7  |      | 84960.2*  | 553  |
| SLay08M                      | 312377.7 |       | 85115    |      | 84960.2*  | 9    |
| SLay09H                      | 135952.1 |       | 116955.3 |      | 107805.8* | 2994 |
| SLay09M                      | 438359.2 |       | 114444.9 |      | 107805.8* | 481  |
| SLay10H                      | 194758.1 |       | $\infty$ |      | 138730.4  |      |
| SLay10M                      | 682209.3 |       | $\infty$ |      | 129579.9  |      |
| Syn15M04M                    | -4909.5  |       | -4937.5* | 503  | -4937.5*  | 4    |

Continued on next page

| Continued from previous page |                 |      |                |      |                |      |
|------------------------------|-----------------|------|----------------|------|----------------|------|
|                              | <b>MINLP-BB</b> |      | <b>Vanilla</b> |      | <b>FilMINT</b> |      |
| Instance                     | Value           | Time | Value          | Time | Value          | Time |
| Syn20M02M                    | -1703           |      | -1752.1*       | 1239 | -1752.1*       | 27   |
| Syn20M03M                    | -2532.9         |      | -1394.6        |      | -2647.0*       | 335  |
| Syn20M04M                    | -1695.1         |      | -1056.3        |      | -3532.7*       | 2326 |
| Syn30M02M                    | -352.4          |      | -13.1          |      | -399.7*        | 1486 |
| Syn30M03M                    | -610.1          |      | -17.1          |      | -648.7         |      |
| Syn30M04M                    | -798.2          |      | -31.1          |      | -852.2         |      |
| Syn40M02M                    | -321.7          |      | -13.1          |      | -374.5         |      |
| Syn40M03M                    | -270.3          |      | -17.1          |      | -358.9         |      |
| Syn40M04M                    | -837.5          |      | -31.1          |      | -795.7         |      |
| Syn40M                       | -39.7           |      | -63.9          |      | -67.7*         | 85   |
